# Supplementary material for: Photolysis and photocatalytic decomposition of sulfamethazine antibiotics in an aqueous solution with TiO2
Source: Royal Society of Chemistry journal article supplement (doi:10.1039/c6ra13435a), 2016-01-01
Supplement: c6ra13435a1.pdf [file c6ra13435a1.pdf]

## Supplementary Information

**Title: Photolysis and photocatalytic decomposition of sulfamethazine antibiotics in an aqueous solution with TiO<sub>2</sub>.**

**Authors:** Tai-Wei Tzeng<sup>a</sup>, Shan-Li Wang<sup>b</sup>, Chiing-Chang Chen<sup>c</sup>, Chen-Chung Tan<sup>a</sup>, Yu-Ting Liu<sup>a</sup>, Tsan-Yao Chen<sup>d</sup>, Yu-Min Tzou<sup>a\*</sup>

\* Corresponding author's information:

Yu-Min Tzou

Department of Soil and Environmental Sciences,

250 Kuo-Kuang Rd., Taichung, 40227 Taiwan, R.O.C.

Tel: 886-4-22840373 Ext. 4206

Fax: 886-4-22855167

Number of Supporting Information (SI) Pages – 9 (including cover sheet)

Number of SI figures – 6

Number of SI Tables – 1

---

**Affiliation:**

<sup>a</sup> Department of Soil and Environmental Sciences, National Chung Hsing University, Taichung, Taiwan.

<sup>b</sup> Department of Agricultural Chemistry, National Taiwan University, Taipei, Taiwan.

<sup>c</sup> Department of Science Education and Application, National Taichung University of Education, Taichung, Taiwan.

<sup>d</sup> Department of Engineering and System Science, National Tsing Hua University, Hsinchu, Taiwan.

## Figures and Tables content

### List of Figures

- Fig. S1** The kinetics of photo-catalytic decomposition of SMT (PCDS) on TiO<sub>2</sub> at pH 3, 5.5, and 10. The insert was the simulation of PCDS using the PFO model.....3
- Fig. S2** Sulfamethazine (SMT) adsorption on 0.5 g/L TiO<sub>2</sub>, and the contributions of self-photolysis and the photo-catalytic decomposition of SMT (PCDS) to overall SMT photo-decomposition at pH 3, 5.5, and 10. ....4
- Fig. S3** The influences of the TiO<sub>2</sub> loadings on sulfamethazine photo-decomposition. The inset was the simulation results of SMT photo-decomposition using the PFO model.....5
- Fig. S4** Effects of (a) TiO<sub>2</sub> loading on dissolved organic carbon (DOC) contents, and (b) SMT initial concentration on sulfamethazine (SMT) photo-decomposition. The inset in (b) was the simulation results of SMT photo-decomposition using the PFO model.....6
- Fig. S5** Effects of sodium iodide (NaI) and isopropanol (ISP) on sulfamethazine (SMT) photo-decomposition in the presence of 0.5 g/L TiO<sub>2</sub> at pH 5.5. The inset was the simulation results of SMT photo-decomposition with NaI and ISP using the PFO model.....7
- Fig. S6** HPLC spectra of the photo-decomposition of sulfamethazine (SMT) and the major intermediates. Sample was extracted after photo-decomposition of 0.072 mM SMT in a system with 0.5 g/L TiO<sub>2</sub> at pH 5.5.....8

### List of Tables

- Table S1** HPLC analyses of the retention time of sulfamethazine (SMT) and its major decomposition products. ....9

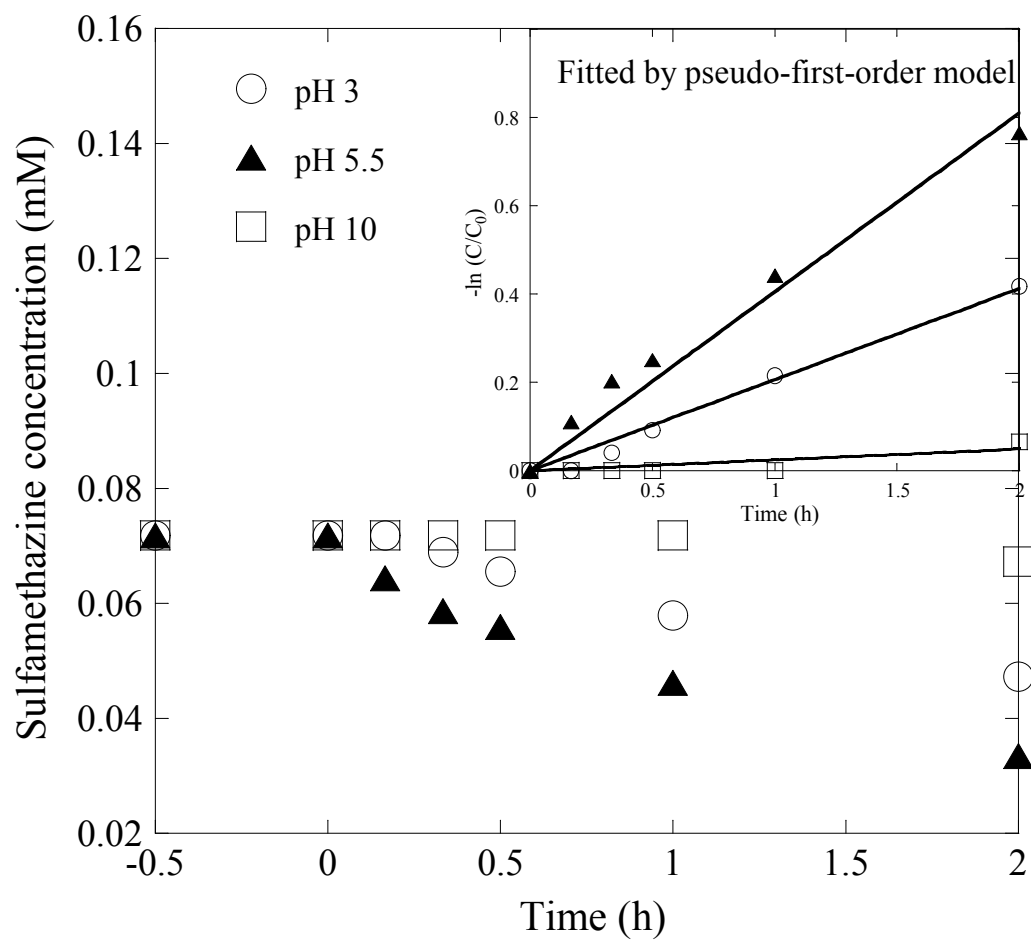

**Fig. S1** The kinetics of photo-catalytic decomposition of 0.072 mM SMT (PCDS) on  $\text{TiO}_2$  at pH 3, 5.5, and 10. The insert was the simulation of PCDS using the PFO model.

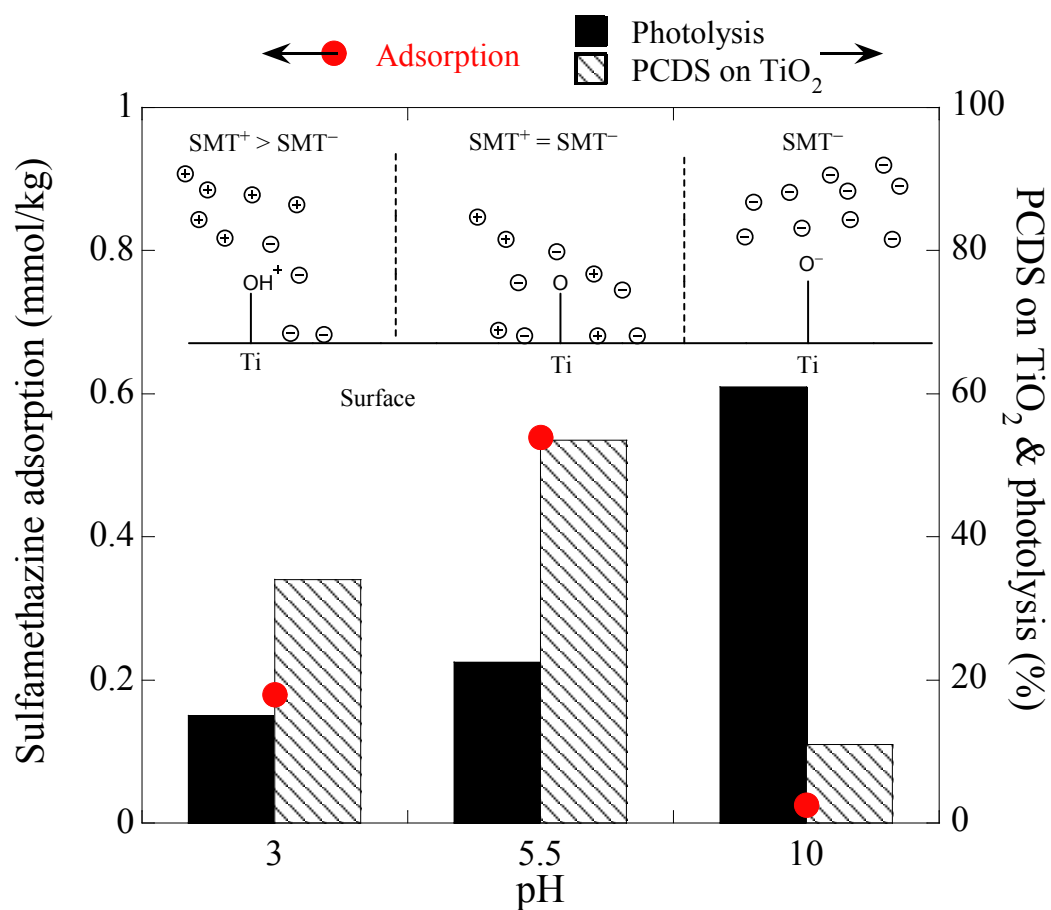

**Fig. S2** Adsorption of 0.072 mM sulfamethazine (SMT) on 0.5 g/L TiO<sub>2</sub>, and the contributions of self-photolysis and the photo-catalytic decomposition of SMT (PCDS) to the overall SMT photo-decomposition at pH 3, 5.5, and 10.

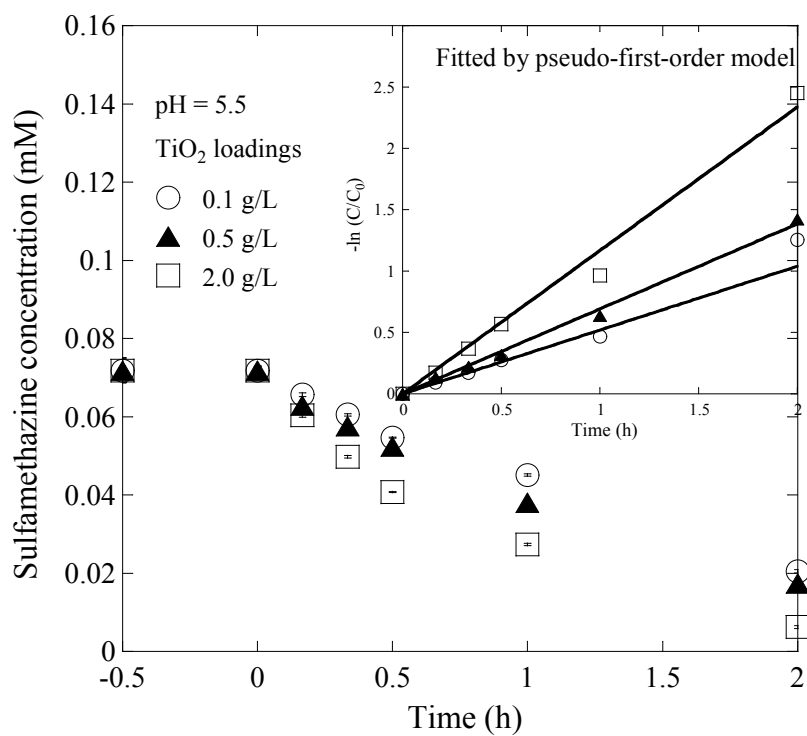

**Fig. S3** The influences of the TiO<sub>2</sub> loadings on 0.072 mM sulfamethazine photo-decomposition. The inset was the simulation results of SMT photo-decomposition using the PFO model.

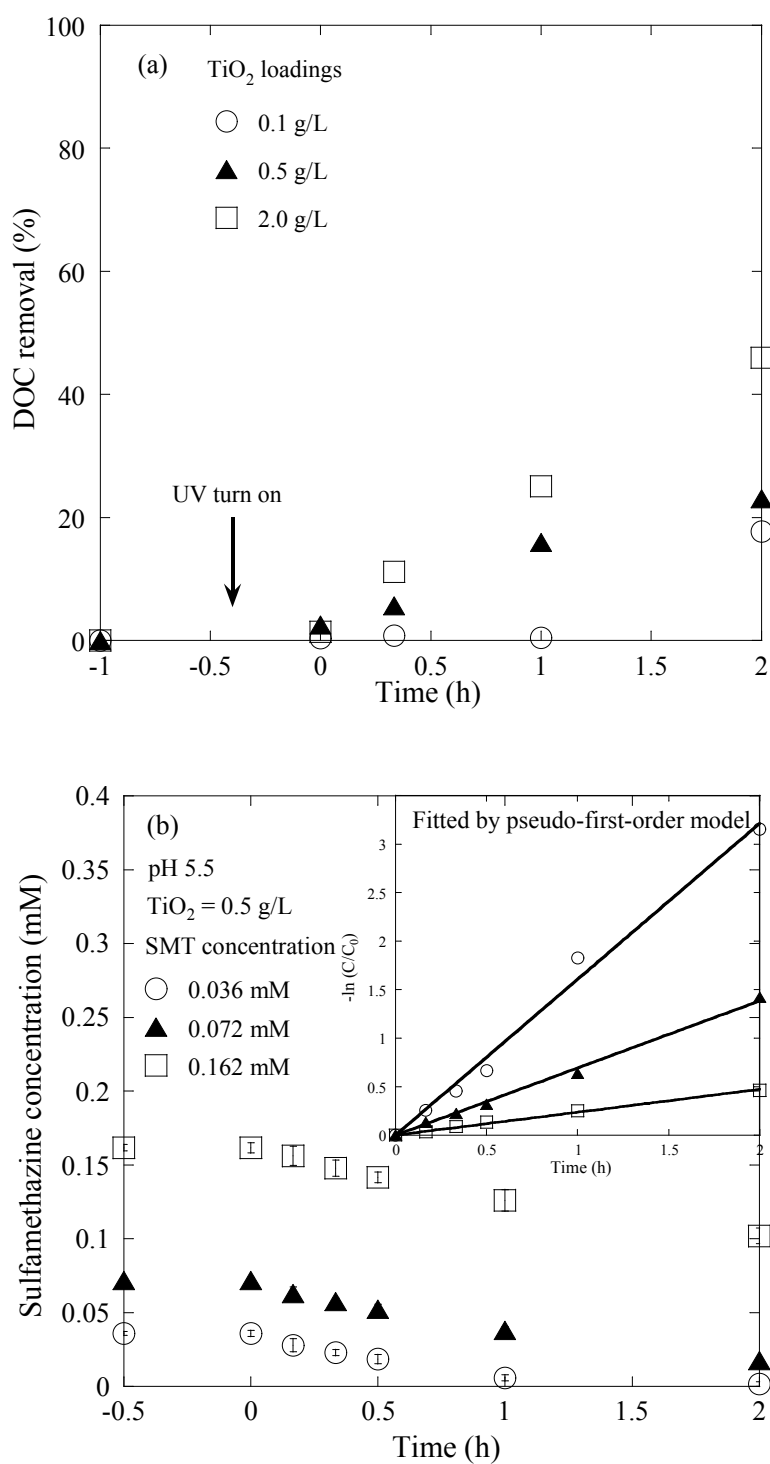

**Fig. S4** Effects of (a)  $\text{TiO}_2$  loading on dissolved organic carbon (DOC) contents, and (b) SMT initial concentration on sulfamethazine (SMT) photo-decomposition. The inset in (b) was the simulation results of SMT photo-decomposition using the PFO model.

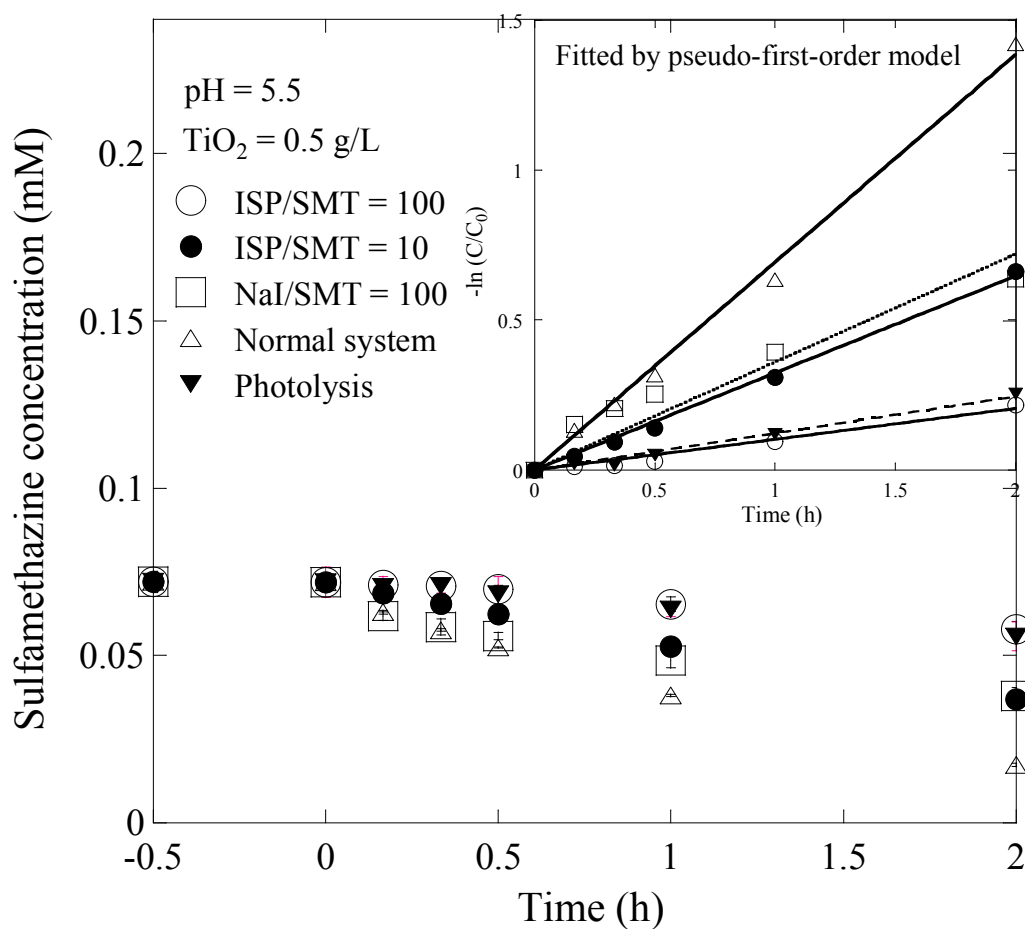

**Fig. S5** Effects of sodium iodide (NaI) and isopropanol (ISP) on 0.072 mM sulfamethazine (SMT) photo-decomposition in the presence of 0.5 g/L TiO<sub>2</sub> at pH 5.5. The inset was the simulation results of SMT photo-decomposition with NaI and ISP using the PFO model. The “normal system” represented the system without the addition of any radical scavengers.

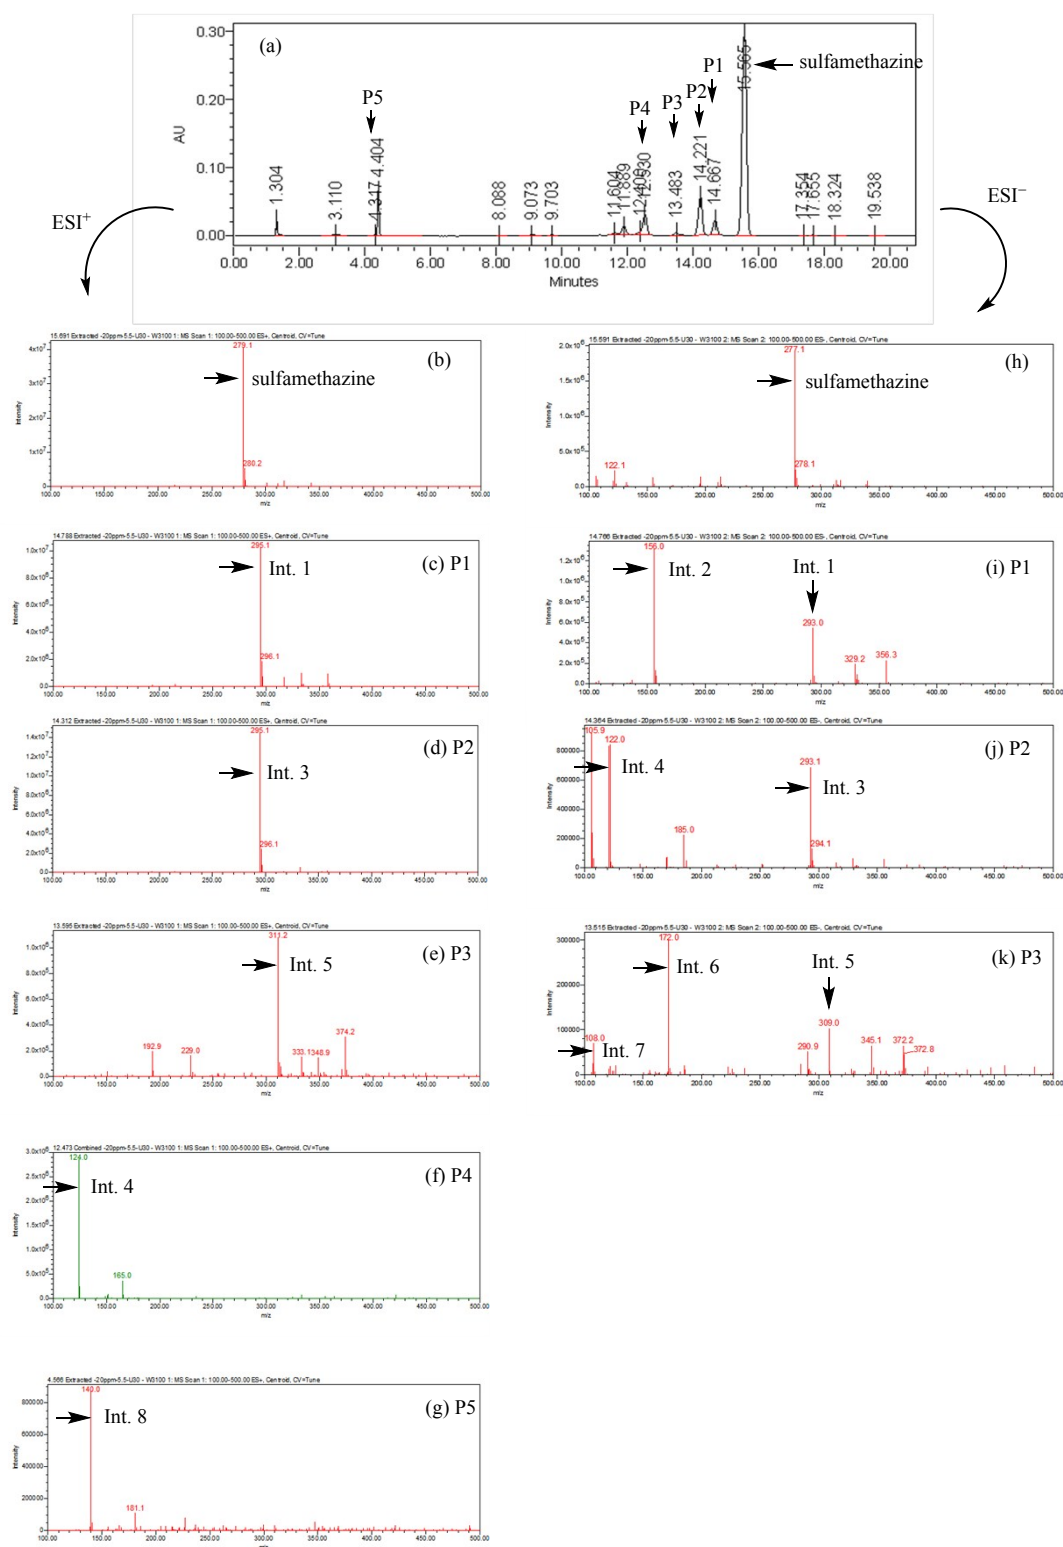

**Fig. S6** HPLC spectra of the photo-decomposition of sulfamethazine (SMT) and the major intermediates. Sample was extracted after photo-decomposition of 0.072 mM SMT in a system with 0.5 g/L TiO<sub>2</sub> at pH 5.5.



**Table S1** HPLC analyses of 0.072 mM sulfamethazine (SMT) and its major photo-decomposition products.

| Compounds           | Retention time<br>(min) | ESI <sup>+</sup><br>(m/z) | ESI <sup>-</sup><br>(m/z) |
|---------------------|-------------------------|---------------------------|---------------------------|
| SMT                 | 15.565                  | 279                       | 277                       |
| <sup>a</sup> Int. 1 | 14.667                  | 295                       | 293                       |
| Int. 2              |                         | <sup>b</sup> n.d.         | 156                       |
| Int. 3              | 14.221                  | 295                       | 293                       |
| Int. 4              |                         |                           | 122                       |
|                     | 12.400                  | 124                       |                           |
| Int. 5              |                         | 311                       | 309                       |
| Int. 6              | 13.483                  | n.d.                      | 172                       |
| Int. 7              |                         | n.d.                      | 108                       |
| Int. 8              | 4.317                   | 140                       | n.d.                      |

<sup>a</sup> Int. indicated the intermediates of sulfamethazine photo-decomposition

<sup>b</sup> n.d. indicated the not detected
